# Supplementary material for: Facile synthesis of crosslinked Cu:ZnS-lignocellulose nanocomposite: a potent antifungal and antisporulant system against the tea pathogen Exobasidium vexans
Source: bioRxiv preprint, doi:10.1101/2021.09.19.460944, version 1 (2021-09-21)
Supplement: ESM_1 [file 460944_file02.docx]

**Facile synthesis of crosslinked Cu:ZnS-lignocellulose nanocomposite: a potent antifungal and antisporulant system against the tea pathogen *Exobasidium vexans***

**Chayanika Chaliha1, Julie Baruah1, 2, Eeshan Kalita1,3***

1Department of Molecular Biology and Biotechnology, Tezpur University, Tezpur, India, 784028

2Department of Chemical Sciences, Tezpur University, Tezpur, India. 784028

3Department of Molecular Biology and Biotechnology, Cotton University, Guwahati, India, 781001

***Corresponding author**

Dr. Eeshan Kalita

eeshankalita@gmail.com

Table S1. Elemental composition of 2 h variant from XPS analysis

| **Element** | **Atomic %**  Cu:ZnS-lignocellulose |
| --- | --- |
| **C** | 31.54 |
| **O** | 51.24 |
| **S** | 6.02 |
| **Cu** | 7.19 |
| **Zn** | 4 |


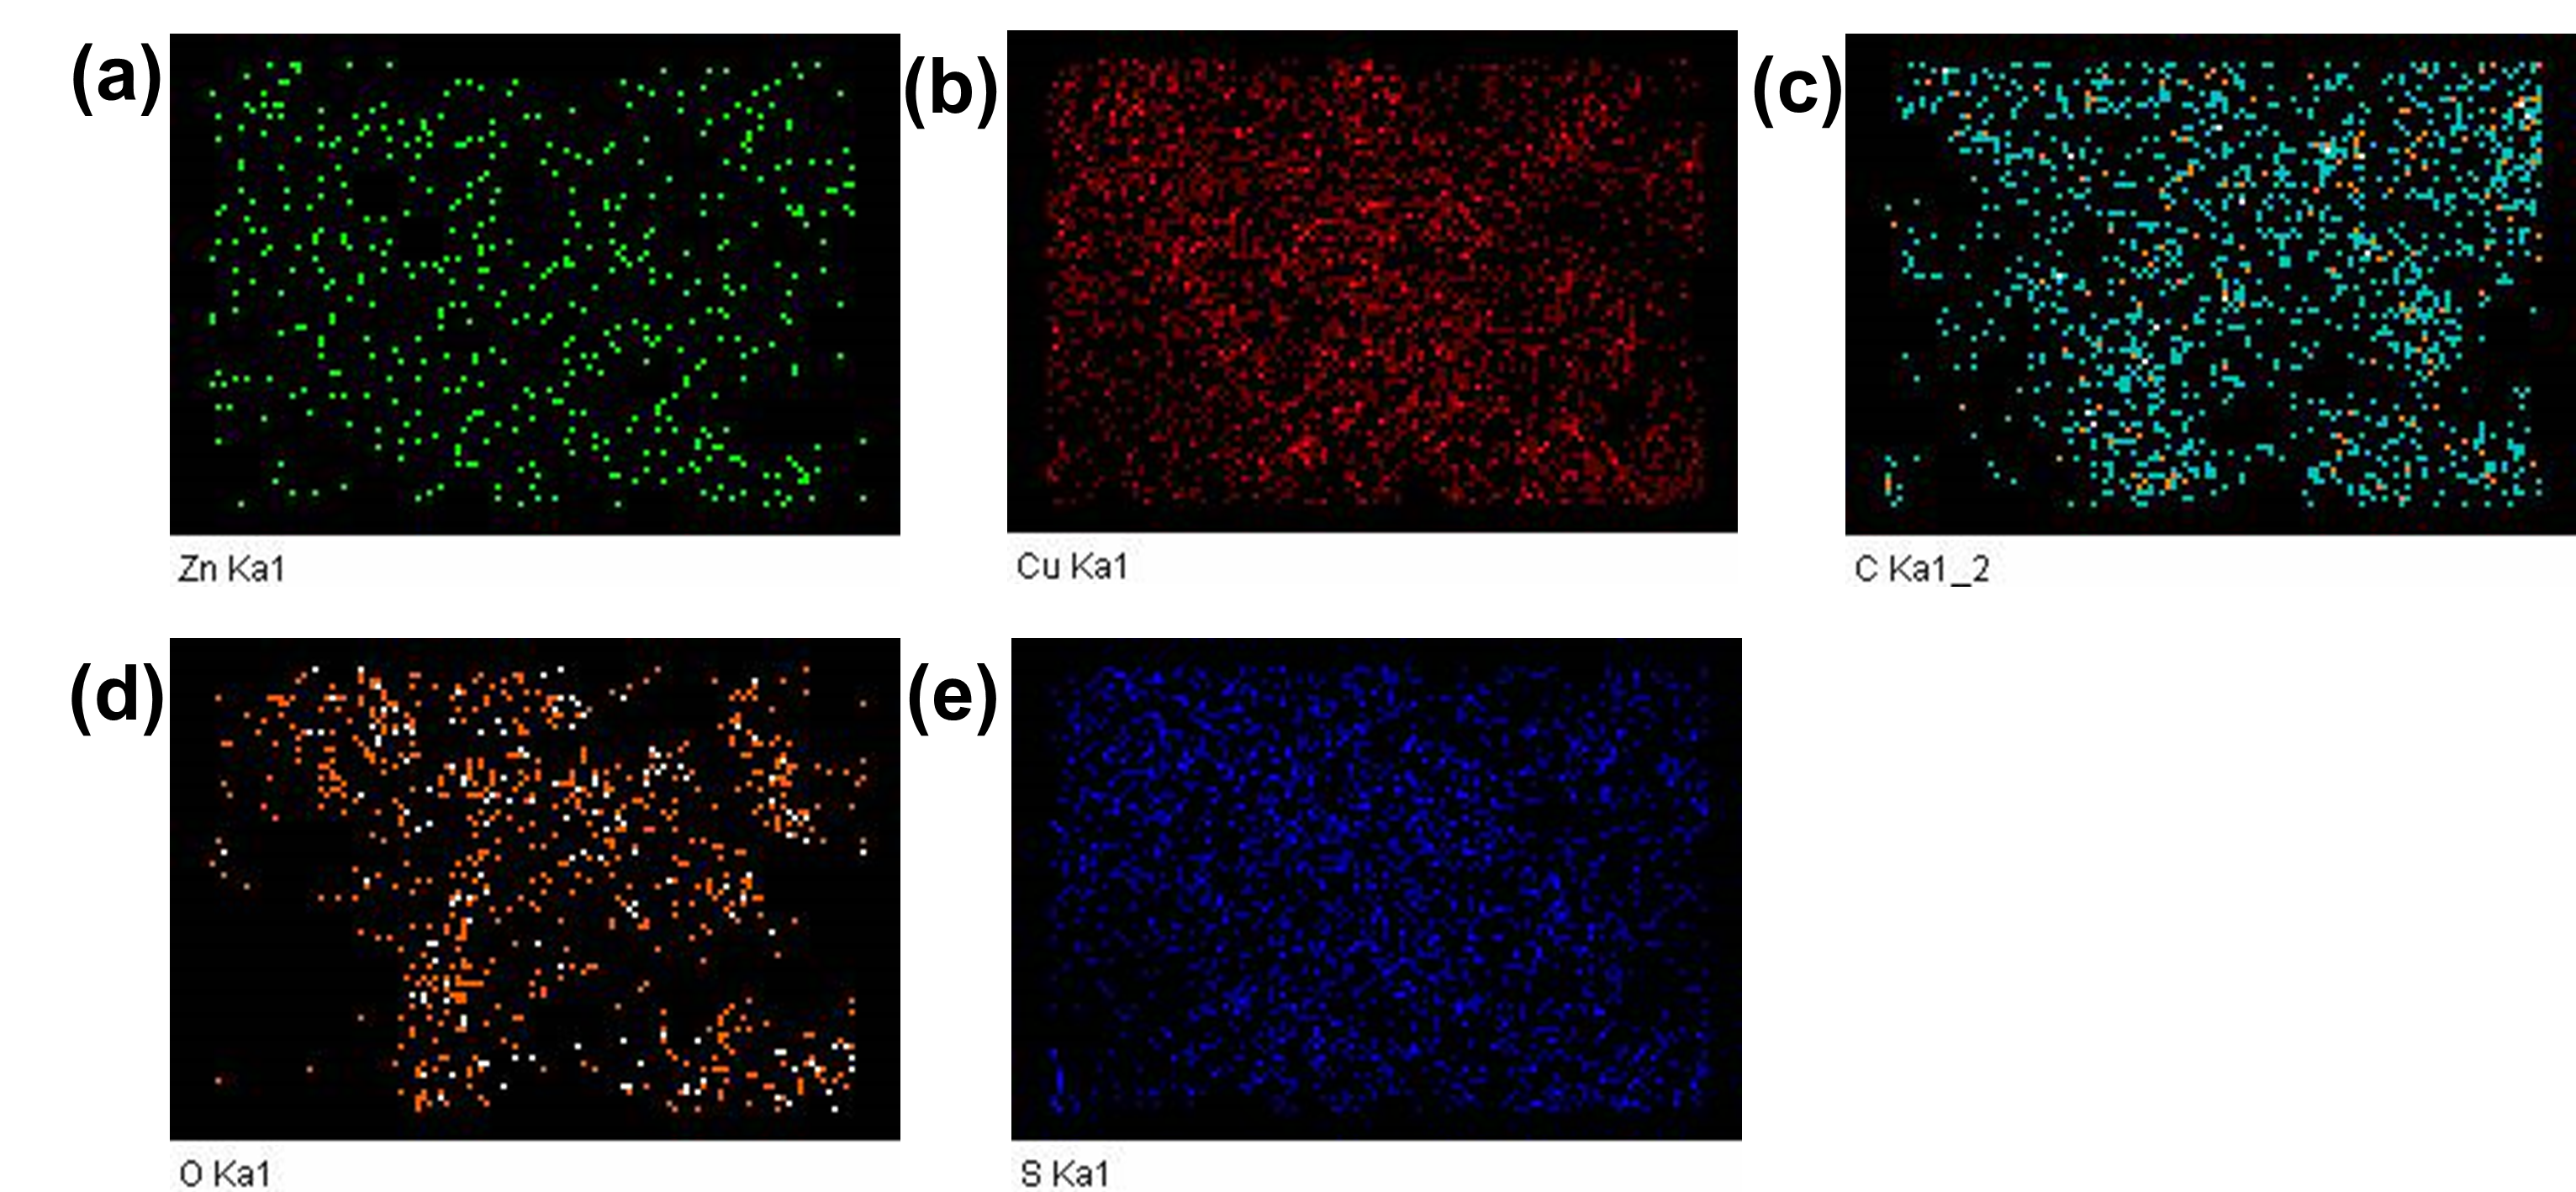


Fig. S1. Pseudo-colour elemental distribution maps of 2 h variant of Cu:ZnS-lignocellulose nanomatrix (a-e).


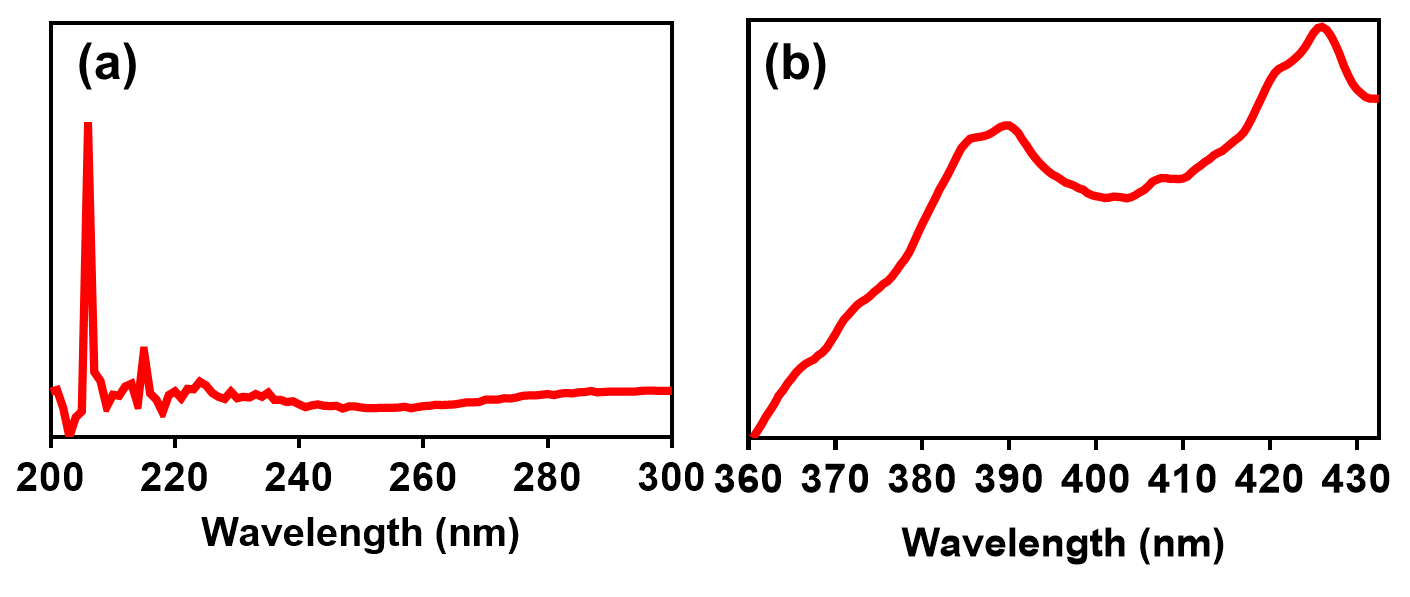


Fig. S2. UV–vis absorption spectra (a) and PL spectra (b) of 2 h variant of Cu:ZnS-lignocellulose nanomatrix
